# Supplementary material for: Updated distribution maps of predominant Culex mosquitoes across the Americas
Source: PubMed Central journal article supplement (PMC8542338; doi:10.1186/s13071-021-05051-3), 2021-10-23

**Supplemental information**  
*Additional file 1*

**Updated distribution maps of predominant  
*Culex* mosquitoes across the Americas**

Morgan E. Gorris<sup>1</sup>, Andrew W. Bartlow<sup>2</sup>, Seth D. Temple<sup>3,4</sup>, Daniel Romero-Alvarez<sup>1,5,6</sup>, Deborah P. Shutt<sup>1</sup>, Jeanne M. Fair<sup>2</sup>, Kimberly A. Kaufeld<sup>3</sup>, Sara Y. Del Valle<sup>1</sup>, Carrie A. Manore<sup>1</sup>

<sup>1</sup>Information Systems and Modeling, Los Alamos National Laboratory, Los Alamos, NM, USA

<sup>2</sup>Biosecurity and Public Health, Los Alamos National Laboratory, Los Alamos, NM, USA

<sup>3</sup>Statistical Sciences, Los Alamos National Laboratory, Los Alamos, NM, USA

<sup>4</sup>Department of Statistics, University of Washington, Seattle, WA, USA

<sup>5</sup>Biodiversity Institute and Department of Ecology & Evolutionary Biology, University of Kansas, Lawrence, KS, USA

<sup>6</sup>OneHealth Research Group, Facultad de Medicina, Universidad de las Américas, Quito, Ecuador

**Tables:**

**Table S1.** The total number of presence data points for each *Culex* species used in model development, after filtering by the 30 km radial buffer.

| <i>Culex</i> species    | VectorBase | VectorMap | NEON | PHON | WADOH | Total      |
|-------------------------|------------|-----------|------|------|-------|------------|
| <i>Pipiens</i>          | 27         | 81        | 13   | 96   | 29    | <b>246</b> |
| <i>Restuans</i>         | 33         | 51        | 21   | 122  | 0     | <b>227</b> |
| <i>Salinarius</i>       | 74         | 70        | 19   | 66   | 0     | <b>229</b> |
| <i>Tarsalis</i>         | 150        | 71        | 20   | 28   | 31    | <b>300</b> |
| <i>Erraticus</i>        | 35         | 43        | 18   | 15   | 0     | <b>111</b> |
| <i>Nigripalpus</i>      | 20         | 46        | 13   | 0    | 0     | <b>79</b>  |
| <i>Quinquefasciatus</i> | 45         | 76        | 15   | 10   | 0     | <b>146</b> |

*Note:* PHON is the Public Health Department of Ontario and WADOH is the Washington State Department of Health.

**Table S2.** Final model specifications and performance metrics for each species.

| <i>Culex</i> species     | Feature classes | $\lambda$ | Train AUC | Mean Test AUC | Mean Difference AUC | Mean Test OR 10% | Var. Test OR 10% | AICc | $\Delta$ AICc | # of parameters |
|--------------------------|-----------------|-----------|-----------|---------------|---------------------|------------------|------------------|------|---------------|-----------------|
| <i>Piapiens</i>          | LQH             | 10        | 0.92      | 0.91          | 0.022               | 0.121            | 0.006            | 4261 | 43            | 37              |
| <i>Restuans</i>          | LQ              | 2         | 0.87      | 0.86          | 0.018               | 0.115            | 0.007            | 4033 | 45            | 21              |
| <i>Salinarius</i>        | LQH             | 20        | 0.85      | 0.83          | 0.019               | 0.115            | 0.004            | 4309 | 140           | 11              |
| <i>Tarsalis</i>          | LQH             | 20        | 0.85      | 0.84          | 0.015               | 0.099            | 0.005            | 5658 | 300           | 15              |
| <i>Erraticus</i>         | LQ              | 10        | 0.87      | 0.85          | 0.034               | 0.136            | 0.035            | 2049 | 20            | 11              |
| <i>Nigripalpus</i>       | L               | 5         | 0.89      | 0.87          | 0.039               | 0.129            | 0.012            | 1362 | 12            | 13              |
| <i>Quinque-fasciatus</i> | LQH             | 10        | 0.90      | 0.88          | 0.024               | 0.131            | 0.011            | 2754 | 29            | 23              |

*Note:* The feature classes are denoted as L for linear function, Q for quadratic function, and H for hinge function. Regularization parameters are denoted as “ $\lambda$ ”, “AUC” is area under the curve, and “OR” is omission rate.

**Table S3.** Summary of environmental factors important for each of the seven *Culex* species obtained from the literature review

| Species                  | Variable class for distribution modeling | Environmental variables              | Relationships between factor and mosquito                          | Region over which conclusions were made | References |
|--------------------------|------------------------------------------|--------------------------------------|--------------------------------------------------------------------|-----------------------------------------|------------|
| <i>Culex erraticus</i>   | Land cover                               | Agricultural wetlands                | Positive                                                           | Gulf Coastal Plain of Georgia, USA      | [79]       |
|                          | Land cover                               | Trees and buttress roots             | Encountered more often in hollow trees, and buttress roots         | Costa Rica                              | [80]       |
|                          | Land cover                               | Bermuda grass                        | Higher number of mosquitoes oviposited in traps with Bermuda grass | San Antonio, TX, USA                    | [81]       |
|                          | Land cover                               | Unshaded                             | Prefers these conditions                                           | Venezuela                               | [82]       |
|                          | Climate                                  | Warm                                 | Prefers these conditions                                           | Venezuela                               | [82]       |
|                          | Land cover                               | Vegetated waters in flooded pastures | Prefers these conditions                                           | Venezuela                               | [82]       |
|                          | Land cover                               | Swamp                                | Prefers these conditions                                           | Venezuela                               | [82]       |
|                          | Land cover                               | Lagoon                               | Prefers these conditions                                           | Venezuela                               | [82]       |
|                          | Land cover                               | Ground pools                         | Prefers these conditions                                           | Venezuela                               | [82]       |
|                          | Land cover                               | Open areas                           | Prefers these conditions                                           | Venezuela                               | [82]       |
|                          | Land cover                               | Eastern red cedar                    | Prefers these conditions                                           | Oklahoma, USA                           | [83]       |
|                          | Land cover                               | Deciduous woodlands                  | Prefers these conditions                                           | Oklahoma, USA                           | [83]       |
| <i>Culex nigripalpus</i> | Climate                                  | Precipitation of driest month        | Positively correlated                                              | St. Johns County, FL, USA               | [65]       |
|                          | Climate                                  | Precipitation in wettest month       | Negatively correlated                                              | St. Johns County, FL, USA               | [65]       |
|                          | Climate                                  | Temperature seasonality              | Negatively correlated                                              | St. Johns County, FL, USA               | [65]       |
|                          | Climate                                  | Mean temperature of coldest quarter  | Negatively correlated                                              | St. Johns County, FL, USA               | [65]       |
|                          | Land cover                               | Urban                                | Negatively correlated                                              | St. Johns County, FL, USA               | [65]       |
|                          | Climate                                  | Isothermality                        | Negatively correlated                                              | St. Johns County, FL, USA               | [65]       |

|                          |            |                                                                   |                                                                                                                                                  |                              |      |
|--------------------------|------------|-------------------------------------------------------------------|--------------------------------------------------------------------------------------------------------------------------------------------------|------------------------------|------|
|                          | Climate    | Annual precipitation                                              | Negatively correlated                                                                                                                            | St. Johns County, FL,<br>USA | [65] |
|                          | Land cover | Hill shade                                                        | Negatively correlated                                                                                                                            | St. Johns County, FL,<br>USA | [65] |
|                          | Land cover | Bermuda grass                                                     | Higher number of<br>mosquitoes oviposited                                                                                                        | San Antonio, TX, USA         | [81] |
|                          | Land cover | Mixed vegetation                                                  | Negative                                                                                                                                         | Florida, USA                 |      |
|                          | Land cover | Roads (paved)                                                     | Prefers these conditions                                                                                                                         | Florida, USA                 | [84] |
|                          | Land cover | Water (ponds)                                                     | Prefers these conditions                                                                                                                         | Florida, USA                 | [84] |
|                          | Climate    | High humidity                                                     | Favor high humidity                                                                                                                              | Florida, USA                 | [85] |
|                          | Climate    | Wet conditions                                                    | Prefers these conditions                                                                                                                         | Florida, USA                 | [86] |
|                          | Land cover | Standing water                                                    | Prefers these conditions                                                                                                                         | Florida, USA                 | [86] |
|                          | Land cover | Urban areas                                                       | Rarely found in urban areas                                                                                                                      | Florida, USA                 | [56] |
| <i>Culex<br/>pipiens</i> | Land Cover | Urban areas                                                       | Rarely found in urban areas<br>Human WNV disease<br>incidence in Northeastern<br>regions was positively<br>associated with urban land<br>covers. | Northeastern USA             | [57] |
|                          | Climate    | Temperature                                                       | Female survival decreased<br>significantly between 20 and<br>24C                                                                                 | Laboratory study             | [42] |
|                          | Land cover | Urban and suburban<br>areas                                       | Mostly urban and suburban<br>mosquito                                                                                                            | Iowa, USA                    | [55] |
|                          | Climate    | Temperature (means,<br>mins, maxs, over<br>certain periods, etc.) | Thrive in warm conditions,<br>but not extremely hot<br>conditions                                                                                | Canada                       | [17] |
|                          | Climate    | Precipitation (annual,<br>monthly)                                | Larva develop in standing<br>water sites                                                                                                         | Canada                       | [17] |
|                          | Land cover | Agricultural land                                                 | Within 2 kms of<br>cropland/built-up land                                                                                                        | Canada                       | [17] |
|                          | Land cover | Non-forested area                                                 | Urban and suburban areas<br>are the main habitat                                                                                                 | Connecticut, USA             | [58] |
|                          | Climate    | Salinity, pH, and<br>temperature of water                         | Preferred larval environment<br>is clean, sweet, slightly<br>basic, warm water                                                                   | Chile                        | [87] |



|                               |            |                              |                                                                                                             |                           |      |
|-------------------------------|------------|------------------------------|-------------------------------------------------------------------------------------------------------------|---------------------------|------|
| <i>Culex quinquefasciatus</i> |            |                              | Human WNV disease incidence in Northeastern regions was positively associated with urban land covers        | Northeastern USA          | [57] |
|                               | Climate    | Temperature                  | Female survival decreased significantly between 28 and 32C                                                  | Laboratory study          | [42] |
|                               | Climate    | Mean diurnal range           | Negatively correlated                                                                                       | St Johns County, FL, USA  | [65] |
|                               | Land cover | Leaf area index              | Negatively correlated                                                                                       | St Johns County, FL, USA  | [65] |
|                               | Land cover | Septic tanks                 | Septic tanks are important habitat                                                                          | Puerto Rico               | [88] |
|                               | Land cover | Container/urban areas        | Containers/urban setting are an important habitat                                                           | Tampa, FL, USA            | [59] |
|                               | Land cover | Sewage areas                 | Sewage areas were breeding sites                                                                            | Atlanta, GA, USA          | [89] |
| <i>Culex restuans</i>         | Climate    | Temperature                  | Female survival decreased significantly between 20 and 24C                                                  | Laboratory study          | [42] |
|                               | Land cover | Urban and rural areas        | Found in rural and urban settings                                                                           | Iowa, USA                 | [55] |
|                               | Land cover |                              |                                                                                                             |                           | [90] |
|                               | Land cover | Residential areas            | Higher number of mosquitoes in residential areas                                                            | New Jersey, USA           | [91] |
|                               | Land cover | Urban areas                  | Egg raft rate was significantly higher in urban land use and land cover habitats.                           | Urbana-Champaign, IL, USA | [92] |
|                               | Land cover | High density canopy coverage | High-density canopy coverage was most frequently associated with high Culex abundance in oviposition traps. | Urbana-Champaign, IL, USA | [92] |

|                         |            |                                                      |                                                                                                                           |                      |      |
|-------------------------|------------|------------------------------------------------------|---------------------------------------------------------------------------------------------------------------------------|----------------------|------|
| <i>Culex salinarius</i> | Land cover | Habitat quality and quantity                         | Female mosquitoes prefer nutrient-enriched containers and decrease ovipositing in containers with conspecific larvae      | Southeastern MI, USA | [93] |
|                         | Land cover | Environmental correlates surrounding discarded tires | Culex were associated with factors related to the surrounding habitat (human population density, canopy cover, tire size) | Central IL, USA      | [94] |
|                         | Land cover | Areas with water (from NDVI)                         | Marshy land is the main habitat                                                                                           | Connecticut, USA     | [58] |
|                         | Land cover | Salt marsh                                           | Larvae found in undisturbed salt marshes                                                                                  | Suffolk Co, NY, USA  | [95] |
|                         | Land cover | Freshwater wetlands                                  | Larvae not considerably found                                                                                             | Suffolk Co, NY, USA  | [95] |
|                         | Land cover | Artificial containers                                | Larvae not considerably found                                                                                             | Suffolk Co, NY, USA  | [95] |
|                         | Land cover | Salt marshes                                         | Adults found significantly more than at upland sites                                                                      | Suffolk Co, NY, USA  | [95] |
|                         | Climate    | Season                                               | Females most prevalent in spring and fall but active year-round                                                           | Chambers CO, TX, USA | [96] |
|                         | Climate    | Ambient temperature                                  | No effect                                                                                                                 | Iowa, USA            | [97] |
|                         | Climate    | Relative humidity                                    | No effect                                                                                                                 | Iowa, USA            | [97] |
|                         | Land cover | Shade                                                | More commonly in deep shade                                                                                               | Delaware, USA        | [98] |
|                         | Land cover | Wetland type                                         | Mostly at Conservation Enhancement and Preservation Program ponds vs. retention ponds and constructed wetlands            | Delaware, USA        | [98] |
|                         | Land cover | Vegetation                                           | More abundant in ponds with loosestrife, grasses (Poaceae), duckweed, and Phragmites, and tend to be                      | Delaware, USA        | [98] |

|                       |                    |                                                                                    |                                                                                                        |                                             |       |
|-----------------------|--------------------|------------------------------------------------------------------------------------|--------------------------------------------------------------------------------------------------------|---------------------------------------------|-------|
|                       |                    |                                                                                    | found in permanent ponds or wetlands                                                                   |                                             |       |
| <i>Culex tarsalis</i> | Topography         | Vegetation                                                                         | Attracted to ground-based light traps than traps suspended in the tree canopy                          | Connecticut, USA                            | [99]  |
|                       | Climate            | Temperature                                                                        | Prefers cooler/spring in FL                                                                            | Florida, USA                                | [100] |
|                       | Land cover         | Agricultural areas                                                                 | Human WNV disease incidence in the western US was positively associated with agricultural land covers. | Western USA                                 | [57]  |
|                       | Land cover         | Vegetation                                                                         | Positively correlated with grass/hay                                                                   | Sioux Falls, SD, USA                        | [101] |
|                       | Land cover         | Rural areas                                                                        | Found in rural settings                                                                                | Iowa, USA                                   | [55]  |
|                       | Land cover         | Grassland/prairie cover                                                            | Grassland cover is favorable habitat for the vector                                                    | Alberta, Manitoba, and Saskatchewan, Canada | [16]  |
|                       | Climate            | Monthly temperatures                                                               | Temperature is important habitat consideration                                                         | Alberta, Manitoba, and Saskatchewan, Canada | [16]  |
|                       | Climate            | Monthly precipitation                                                              | Increases with vector abundance; negatively coefficient for WNV infection rate model                   | Alberta, Manitoba, and Saskatchewan, Canada | [16]  |
|                       | Climate            | Future climate scenarios                                                           | Vector abundance and WNV infection rate increase with a warm & dry climate                             | Alberta, Manitoba, and Saskatchewan, Canada | [16]  |
|                       | Land cover         | Irrigated land area                                                                | Positively correlated with vector abundance; irrigated land may make good habitat for vector           | North-central CO, USA                       | [102] |
| Topography            | Elevation          | Negatively correlated with vector abundance                                        | North-central CO, USA                                                                                  | [102]                                       |       |
| Land cover            | Impervious surface | Negatively correlated with vector abundance, but a positive regression coefficient | North-central CO, USA                                                                                  | [102]                                       |       |

|            |                             |                                                                           |                  |       |
|------------|-----------------------------|---------------------------------------------------------------------------|------------------|-------|
| Climate    | Dew point                   | Positively correlated with<br>vector abundance                            | Bismark, ND, USA | [103] |
| Climate    | Day length                  | Positively correlated with<br>vector abundance                            | Bismark, ND, USA | [103] |
| Climate    | Number of days<br>below 0°C | Positively correlated with<br>abundance                                   | Bismark, ND, USA | [103] |
| Land cover | Flood gauge height          | Negatively correlated with<br>vector abundance due to<br>extreme flooding | Bismark, ND, USA | [103] |

---

**Table S4.** Percent environmental variable contribution during Maxent model development for each *Culex* species.

| Environmental variable | <i>Pipiens</i>                             | <i>Restuans</i> | <i>Salinarius</i> | <i>Tarsalis</i> | <i>Erraticus</i> | <i>Nigripalpus</i> | <i>Quinquefasciatus</i> |      |
|------------------------|--------------------------------------------|-----------------|-------------------|-----------------|------------------|--------------------|-------------------------|------|
| Climate                | Annual mean temperature                    | 14.7            | 0.2               | 0.6             | 21.4             | 0.0                | 0.9                     | 18.2 |
|                        | Temperature annual range                   | 0.1             | 0.7               | 0.0             | 0.0              | 0.1                | 0.0                     | 0.2  |
|                        | Mean diurnal temp. range                   | 2.3             | 0.9               | 0.0             | 0.0              | 0.0                | 0.0                     | 2.3  |
|                        | Max. temp. in the warmest month            | 0.0             | 6.6               | 0.0             | 8.9              | 0.0                | 0.1                     | 2.7  |
|                        | Min. temp. in the coldest month            | 1.6             | 1.1               | 0.4             | 2.6              | 11.8               | 0.3                     | 13.8 |
|                        | Annual mean specific humidity              | 1.8             | 0.7               | 8.3             | 0.8              | 0.0                | 0.5                     | 0.0  |
|                        | Specific humidity in the most humid month  | 6.4             | 0.4               | 5.8             | 14.1             | 15.7               | 71.7                    | 1.3  |
|                        | Specific humidity in the least humid month | 0.4             | 1.6               | 0.0             | 1.9              | 0.6                | 2.0                     | 0.4  |
| Land cover             | Evergreen/deciduous needleleaf trees       | <0.1            | 17.5              | 0.2             | 0.0              | 0.0                | 4.3                     | 0.6  |
|                        | Evergreen broadleaf trees                  | 0.0             | 0.4               | 0.0             | 0.0              | 0.5                | 1.2                     | 8.7  |
|                        | Deciduous broadleaf trees                  | 0.5             | 1.0               | 0.0             | 0.8              | 0.3                | 0.3                     | 0.1  |
|                        | Mixed/other trees                          | 0.3             | 1.0               | 0.0             | 0.8              | 2.3                | 0.2                     | 2.0  |
|                        | Shrubs                                     | 0.0             | 19.2              | 4.9             | 0.1              | 3.7                | 0.3                     | 5.3  |
|                        | Herbaceous vegetation                      | 0.0             | 15.7              | 0.3             | 0.3              | 3.8                | 1.2                     | 1.8  |
|                        | Cultivated and managed vegetation          | 8.8             | 2.9               | 34.1            | 35.8             | 36.7               | 5.3                     | 4.0  |
|                        | Regularly flooded vegetation               | 0.0             | 2.4               | 0.0             | 0.0              | 0.0                | 0.1                     | 0.0  |
|                        | Urban/built-up                             | 57.4            | 11.7              | 33.8            | 12.0             | 13.3               | 1.8                     | 32.9 |
|                        | Snow/ice                                   | 0.0             | 0.0               | 0.0             | 0.3              | 0.0                | 0.0                     | 0.0  |
|                        | Barren                                     | 0.0             | 0.0               | 0.0             | 0.0              | 0.0                | 0.0                     | 0.1  |
|                        | Open water                                 | 2.7             | 2.7               | 0.2             | 0.0              | 1.4                | 1.2                     | 1.3  |
|                        | Habitat                                    | Evenness of EVI | 0.0               | 3.4             | 0.0              | 0.0                | 0.7                     | 1.2  |
|                        |                                            |                 |                   |                 |                  |                    |                         |      |
| Topography             | Elevation                                  | 2.9             | 6.1               | 5.1             | 0.2              | 9.1                | 2.5                     | 3.6  |
|                        | Roughness index                            | 0.0             | 0.4               | 0.3             | 0.0              | 0.1                | 0.5                     | 0.0  |
|                        | Slope                                      | 0.0             | 2.8               | 2.3             | 0.0              | 0.1                | 3.6                     | 0.5  |
|                        | Terrain ruggedness index                   | 0.0             | 0.6               | 3.7             | 0.0              | 0.0                | 0.8                     | 0.1  |

**Figures:**

**Figure S1.** Maps of the environmental training area unique to each species used for the Maxent models across North America for (a) *Cx. pipiens*, (b) *Cx. restuans*, (c) *Cx. salinarius*, and (d) *Cx. tarsalis*. These were created by buffering the data based on the median distance from each presence data point to the centroid of all presence points. Ten thousand background points are randomly sampled from the shaded environmental training area when running Maxent.

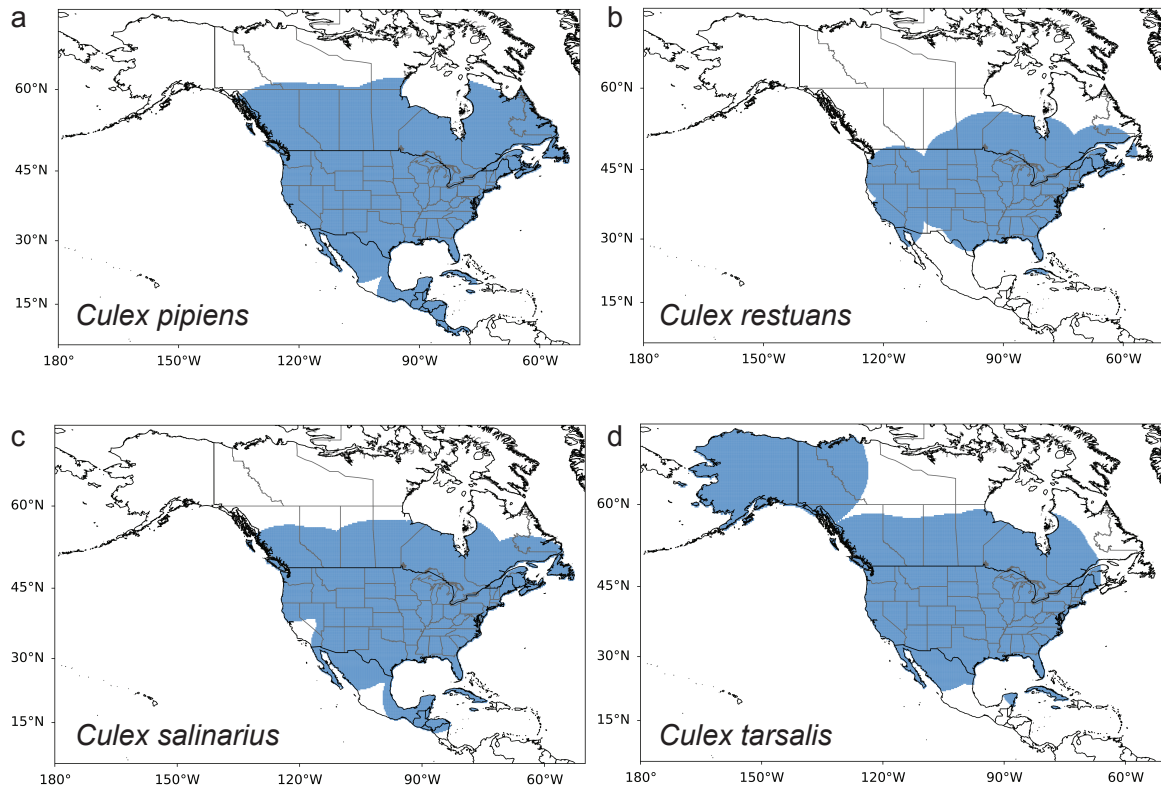

**Figure S2.** Maps of the environmental training area unique to each species used for the Maxent models across North and South America for (a) *Cx. erraticus*, (b) *Cx. nigripalpus*, and (c) *Cx. quinquefasciatus*. These were created by buffering the data based on the median distance from each presence data point to the centroid of all presence points. Ten thousand background points are randomly sampled from the shaded environmental training area when running Maxent.

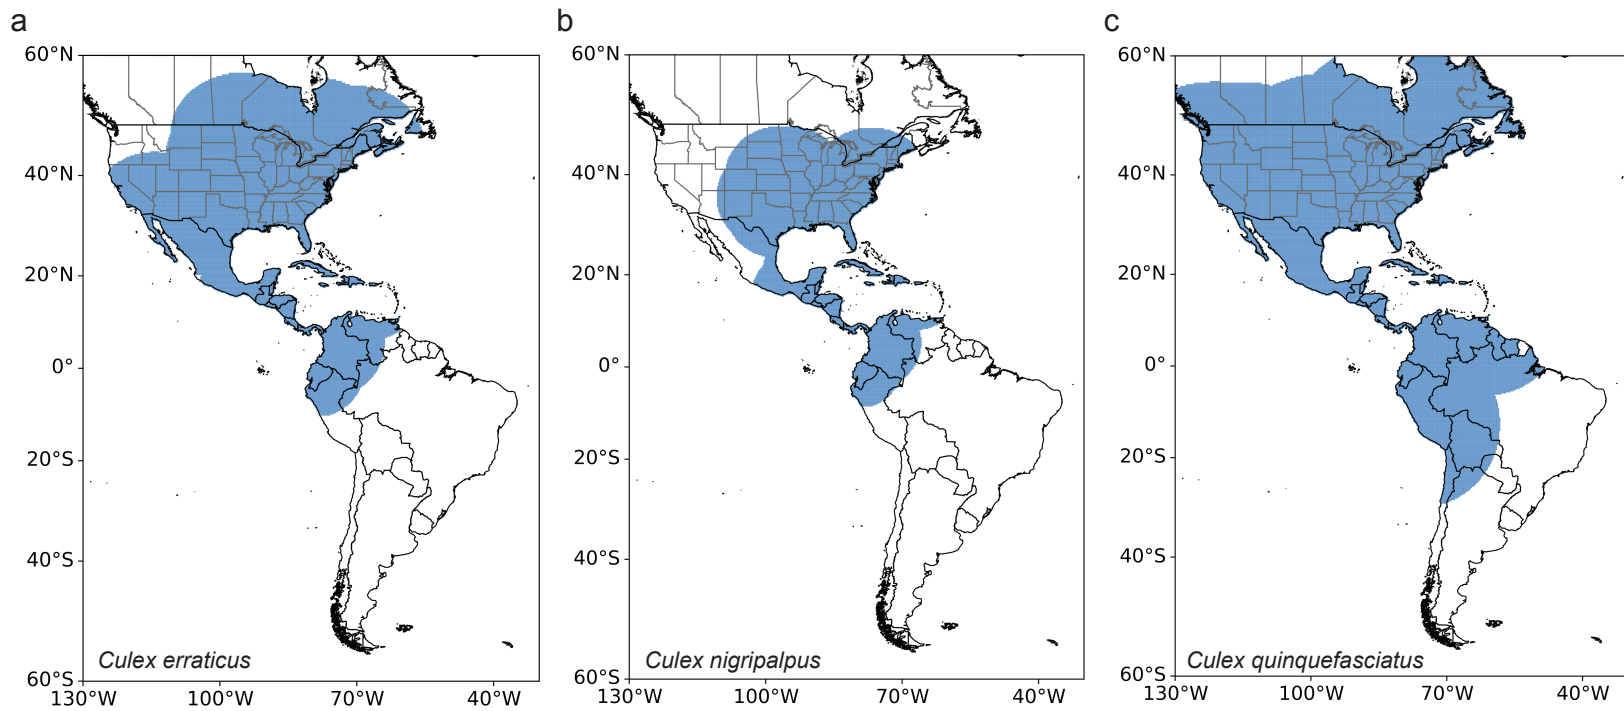

**Figure S3.** After extrapolating the Maxent models across North America, areas that are highlighted have novel climate or environmental conditions relative to the background environmental training dataset. This is unique to each species: (a) *Cx. pipiens*, (b) *Cx. restuans*, (c) *Cx. salinarius*, and (d) *Cx. tarsalis*.

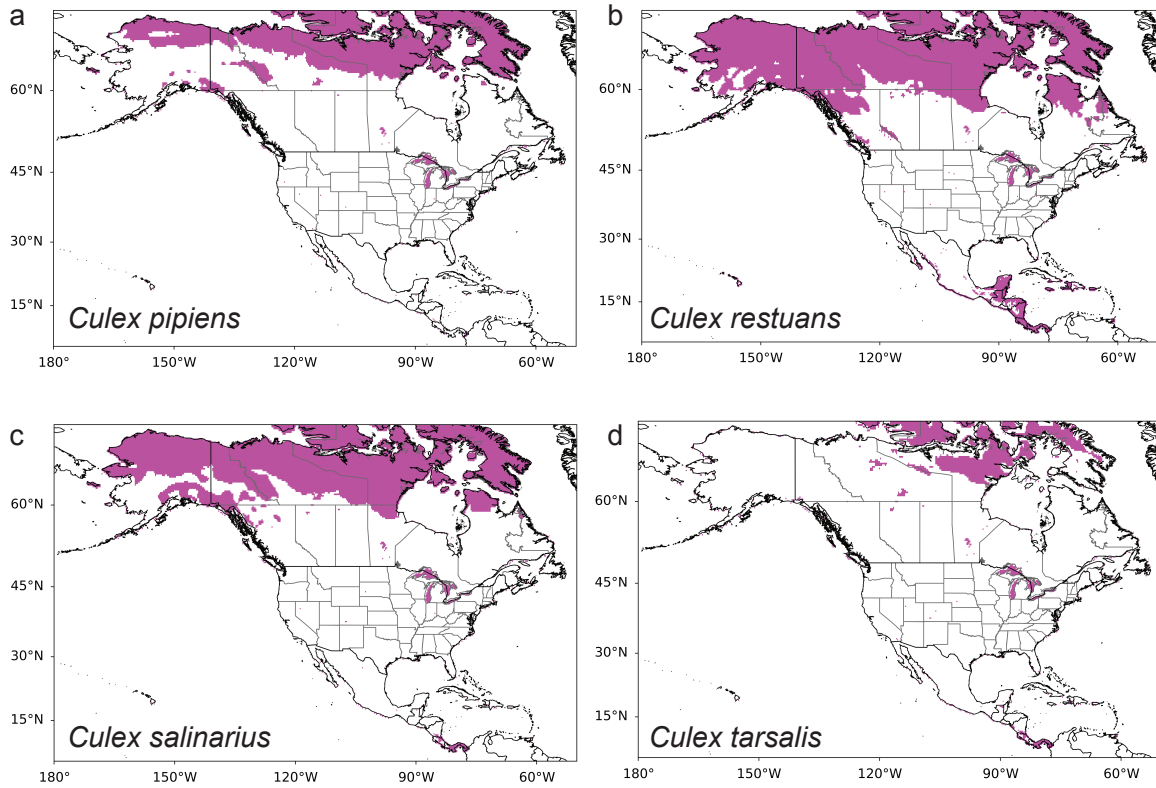



**Figure S4.** After extrapolating the Maxent models across North and South America, areas that are highlighted have novel climate or environmental conditions relative to the background environmental training dataset. This is unique to each species: (a) *Cx. erraticus*, (b) *Cx. nigripalpus*, and (c) *Cx. quinquefasciatus*.

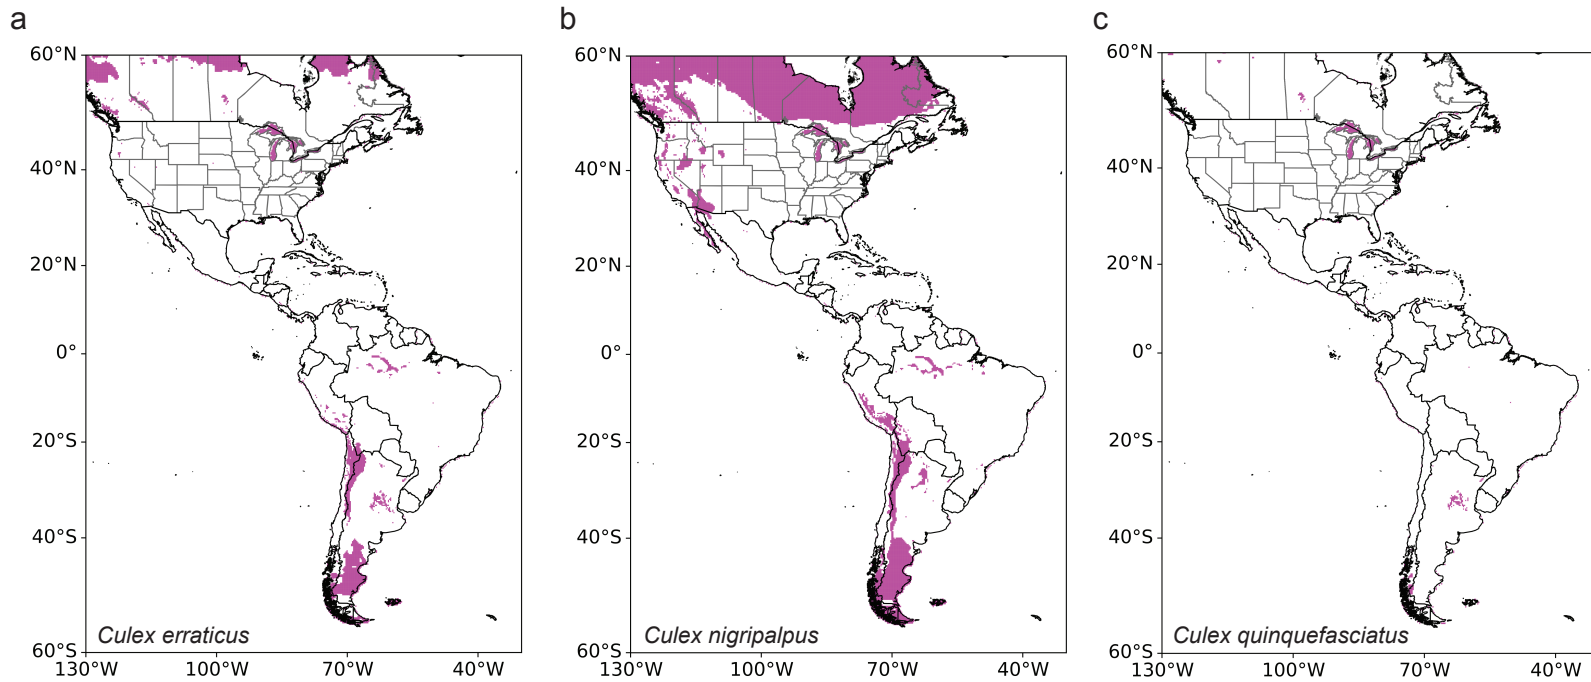

**Figure S5.** Maps of the difference between the maximum and minimum suitability output amongst the ten bootstrapped replicates (i.e., the range) to show areas of high or low uncertainty in our models for species in North America: (a) *Cx. pipiens*, (b) *Cx. restuans*, (c) *Cx. salinarius*, and (d) *Cx. tarsalis*.

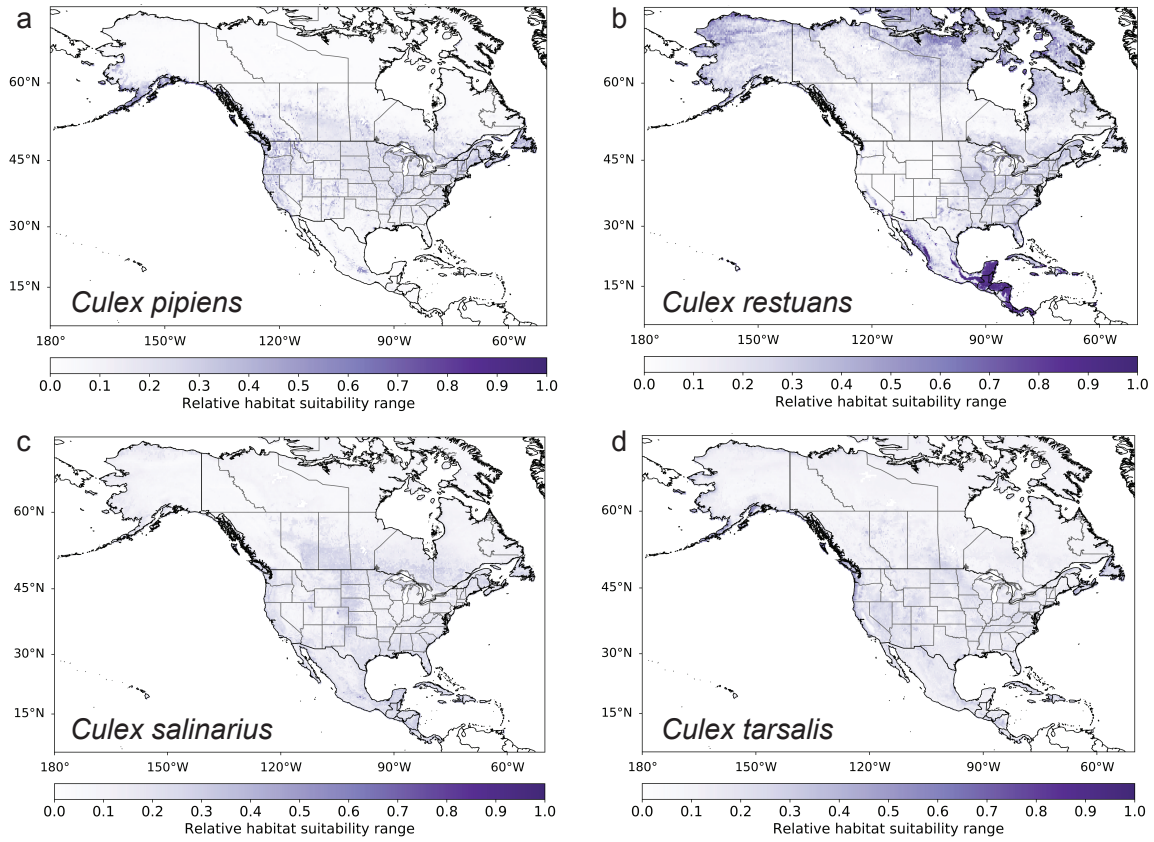

**Figure S6.** Maps of the difference between the maximum and minimum suitability output amongst the ten bootstrapped replicates (i.e., the range) to show areas of high or low uncertainty in our models for species in North and South America: (a) *Cx. erraticus*, (b) *Cx. nigripalpus*, and (c) *Cx. quinquefasciatus*.

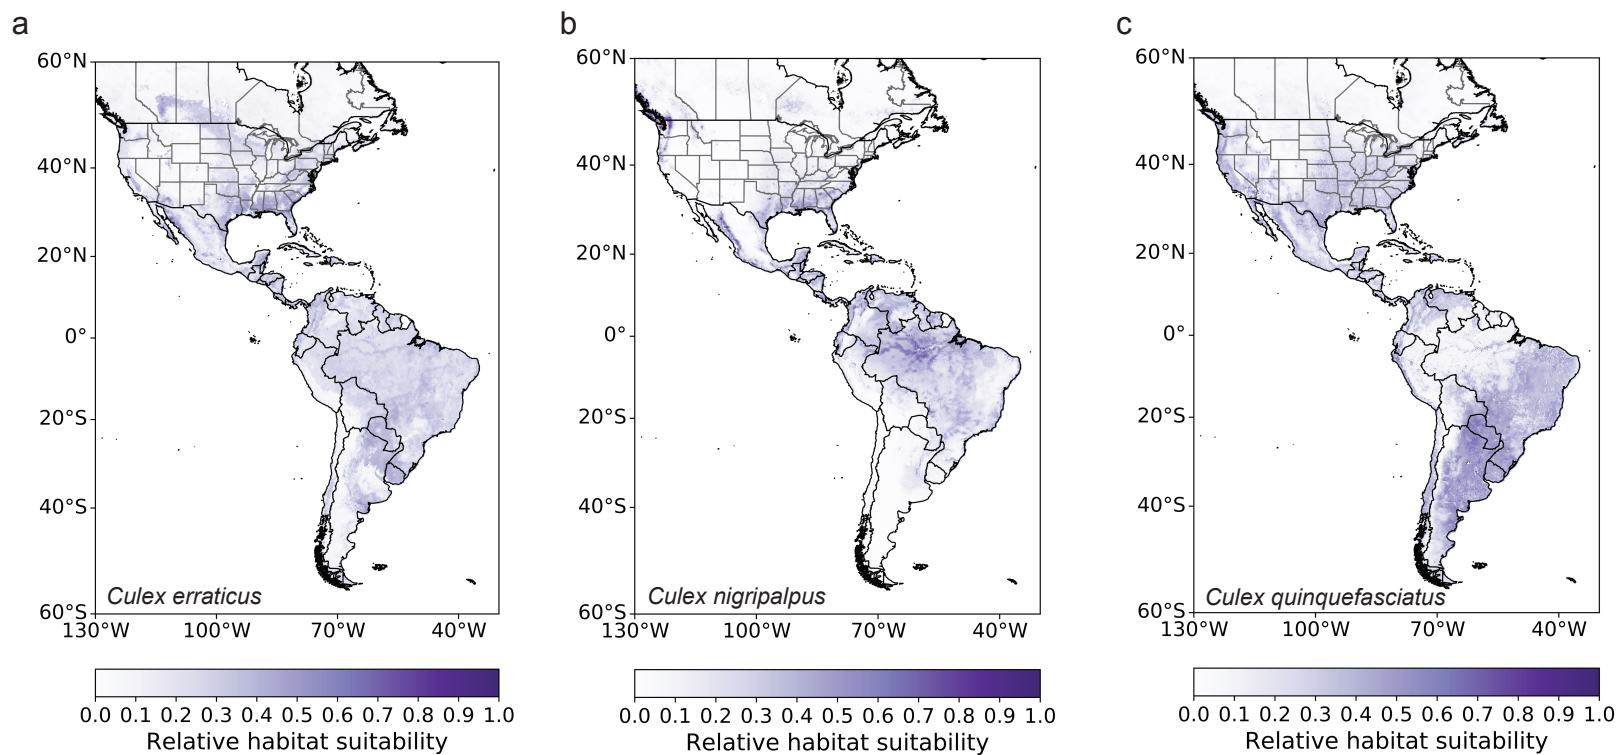

Supplement: 13071_2021_5051_MOESM1_ESM.pdf [file 13071_2021_5051_MOESM1_ESM.pdf]
